# Supplementary material
Source: PubMed Central journal article supplement (PMC7546441)
Supplement: NIHMS1634252-supplement-Supporting_information.pdf [file NIHMS1634252-supplement-Supporting_information.pdf]

In the format provided by the authors and unedited.

# Engineering a nicotinamide mononucleotide redox cofactor system for biocatalysis

**William B. Black<sup>1,6</sup>, Linyue Zhang<sup>1,6</sup>, Wai Shun Mak<sup>2,3,6</sup>, Sarah Maxel<sup>1</sup>, Youtian Cui<sup>2,3</sup>, Edward King<sup>4</sup>, Bonnie Fong<sup>1</sup>, Alicia Sanchez Martinez<sup>1</sup>, Justin B. Siegel<sup>2,3,5\*</sup> and Han Li<sup>1\*</sup>**

---

<sup>1</sup>Department of Chemical and Biomolecular Engineering, University of California, Irvine, Irvine, CA, USA. <sup>2</sup>Department of Chemistry, University of California, Davis, Davis, CA, USA. <sup>3</sup>Genome Center, University of California, Davis, Davis, CA, USA. <sup>4</sup>Department of Molecular Biology and Biochemistry, University of California, Irvine, Irvine, CA, USA. <sup>5</sup>Department of Biochemistry and Molecular Medicine, University of California, Davis, Davis, CA, USA.

<sup>6</sup>These authors contributed equally: William B. Black, Linyue Zhang, Wai Shun Mak. \*e-mail: [jsiegel@ucdavis.edu](mailto:jsiegel@ucdavis.edu); [han.li@uci.edu](mailto:han.li@uci.edu)

## **Engineering a nicotinamide mononucleotide redox cofactor system for biocatalysis**

**William B. Black<sup>1,6</sup>, Linyue Zhang<sup>1,6</sup>, Wai Shun Mak<sup>2,3,6</sup>, Sarah Maxel<sup>1</sup>, Youtian Cui<sup>2,3</sup>, Edward King<sup>4</sup>, Bonnie Fong<sup>1</sup>, Alicia Sanchez Martinez<sup>1</sup>, Justin B. Siegel<sup>2,3,5,\*</sup>, and Han Li<sup>1,\*</sup>**

*<sup>1</sup>Department of Chemical and Biomolecular Engineering, University of California, Irvine, Irvine, CA, <sup>2</sup>Department of Chemistry, University of California, Davis, Davis, CA, <sup>3</sup>Genome Center, University of California, Davis, Davis, CA, <sup>4</sup>Department of Molecular Biology and Biochemistry, University of California, Irvine, Irvine, CA, <sup>5</sup>Department of Biochemistry and Molecular Medicine, University of California, Davis, Davis, CA.*

*<sup>6</sup>These authors contributed equally to this work. \*To whom correspondence should be addressed. Email: han.li@uci.edu, jbsiegel@ucdavis.edu*

### **Supplementary information**

**Supplementary Table 1:** Sequence conservation analysis of I195 in its protein family

**Supplementary Table 2:** Full steady-state kinetics parameters of Bs GDH variants

**Supplementary Table 3:** Plasmids and strains used in this study

**Supplementary Table 4:** Accession numbers for proteins used in this study

**Supplementary Table 5:** Mass spectrometry parameters for intracellular cofactor concentration analysis

**Supplementary Figure 1:** XenA activity with different cofactors

**Supplementary Figure 2:** Engineering P450 BM3 to improve the NMNH-dependent activity

**Supplementary Figure 3:** Cytochrome *c* reduction in the presence and absence of P450 enzyme

**Supplementary Figure 4:** Production inhibition study of wild type and engineered Bs GDH

**Supplementary Figure 5:** Dependence of growth on NMN<sup>+</sup> concentration

**Supplementary Figure 6:** Strain engineering for whole-cell biocatalysis

**Supplementary Figure 7:** Product levels in whole-cell ketoisophorone conversion

**Supplementary Figure 8:** Active site of glucose dehydrogenase with NAD<sup>+</sup> bound

**Supplementary Table 1: Sequence conservation analysis of I195 in its protein family PF13561.5.**

|          | <b>Frequency</b> | <b>Percent of representation</b> |
|----------|------------------|----------------------------------|
| <b>A</b> | 110              | 2.50%                            |
| <b>C</b> | 2                | 0.00%                            |
| <b>D</b> | 33               | 0.70%                            |
| <b>E</b> | 31               | 0.70%                            |
| <b>F</b> | 461              | 10.40%                           |
| <b>G</b> | 112              | 2.50%                            |
| <b>H</b> | 10               | 0.20%                            |
| <b>I</b> | 371              | 8.40%                            |
| <b>K</b> | 20               | 0.50%                            |
| <b>L</b> | 899              | 20.30%                           |
| <b>M</b> | 1,768            | 39.90%                           |
| <b>N</b> | 42               | 0.90%                            |
| <b>P</b> | 21               | 0.50%                            |
| <b>Q</b> | 97               | 2.20%                            |
| <b>R</b> | 65               | 1.50%                            |
| <b>S</b> | 67               | 1.50%                            |
| <b>T</b> | 210              | 4.70%                            |
| <b>V</b> | 45               | 1.00%                            |
| <b>W</b> | 52               | 1.20%                            |
| <b>Y</b> | 15               | 0.30%                            |

This result showed that all 20 amino acids are represented at this position with methionine and leucine accounting for more than 50% of all occurrences at this position in the family.

**Supplementary Table 2: Full Steady-State Kinetics Parameters**

| Enzyme                                     | Cofactor          | $K_{ia}$ (mM)                  | $k_{cat}$ ( $s^{-1}$ )         | $K_A$ (mM)                     | $K_B$ (mM)                  | $k_1$ ( $mM^{-1}s^{-1}$ )      | $k_2$ ( $s^{-1}$ )             | $k_3$ ( $mM^{-1}s^{-1}$ )      | $(k_1k_3/k_2)$ ( $mM^{-2}s^{-1}$ ) |
|--------------------------------------------|-------------------|--------------------------------|--------------------------------|--------------------------------|-----------------------------|--------------------------------|--------------------------------|--------------------------------|------------------------------------|
| Bs GDH WT                                  | NAD <sup>+</sup>  | $(6.8 \pm 2.0) \times 10^{-2}$ | $(3.7 \pm 0.5) \times 10^1$    | $(5.1 \pm 0.2) \times 10^{-2}$ | 8.3±2.8                     | $(7.2 \pm 1.3) \times 10^2$    | $(5.0 \pm 2.3) \times 10^1$    | 4.8±2.3                        | $(6.9 \pm 1.3) \times 10^1$        |
|                                            | NADP <sup>+</sup> | $(8.5 \pm 0.4) \times 10^{-3}$ | $(3.0 \pm 0.7) \times 10^1$    | $(1.0 \pm 0.1) \times 10^{-2}$ | 7.2±0.8                     | $(3.0 \pm 0.4) \times 10^3$    | $(2.5 \pm 0.2) \times 10^1$    | 4.1±0.6                        | $(4.9 \pm 0.9) \times 10^2$        |
|                                            | NMN <sup>+</sup>  | n.d. <sup>a</sup>              | n.d. <sup>a</sup>              | n.d. <sup>a</sup>              | n.d. <sup>a</sup>           | $(8.6 \pm 2.2) \times 10^{-2}$ | n.d. <sup>a</sup>              | n.d. <sup>a</sup>              | $(2.5 \pm 0.3) \times 10^{-4}$     |
| Bs GDH Triple<br>(I195R-A93K-<br>Y39Q)     | NAD <sup>+</sup>  | n.d. <sup>b</sup>              | n.d. <sup>b</sup>              | n.d. <sup>b</sup>              | n.d. <sup>b</sup>           | n.d. <sup>b</sup>              | n.d. <sup>b</sup>              | $(2.6 \pm 0.2) \times 10^{-4}$ | $(6.6 \pm 1.1) \times 10^{-5}$     |
|                                            | NADP <sup>+</sup> | 4.6±0.6                        | $(3.7 \pm 1.3) \times 10^{-1}$ | $(4.7 \pm 2.3) \times 10^1$    | $(1.7 \pm 0.6) \times 10^2$ | $(8.8 \pm 3.0) \times 10^{-2}$ | $(4.2 \pm 1.8) \times 10^{-1}$ | $(2.2 \pm 0.1) \times 10^{-3}$ | $(4.8 \pm 0.6) \times 10^{-4}$     |
|                                            | NMN <sup>+</sup>  | $(3.4 \pm 0.6) \times 10^{-1}$ | $(4.1 \pm 0.1) \times 10^{-1}$ | $(1.9 \pm 0.2) \times 10^{-1}$ | $(9.0 \pm 1.6) \times 10^1$ | $(2.2 \pm 0.2) \times 10^1$    | $(7.5 \pm 1.8) \times 10^{-1}$ | $(4.7 \pm 0.8) \times 10^{-3}$ | $(1.4 \pm 0.1) \times 10^{-2}$     |
| Bs GDH Ortho<br>(I195R-A93K-<br>Y39Q-S17E) | NAD <sup>+</sup>  | n.d. <sup>a</sup>              | n.d. <sup>a</sup>              | n.d. <sup>a</sup>              | n.d. <sup>a</sup>           | $(1.4 \pm 0.7) \times 10^{-3}$ | n.d. <sup>a</sup>              | n.d. <sup>a</sup>              | $(0.6 \pm 0.2) \times 10^{-5}$     |
|                                            | NADP <sup>+</sup> | $(5.2 \pm 0.5) \times 10^{-1}$ | $(2.9 \pm 0.3) \times 10^{-1}$ | $(6.5 \pm 1.4) \times 10^{-1}$ | $(4.2 \pm 0.7) \times 10^2$ | $(4.6 \pm 1.0) \times 10^{-1}$ | $(2.4 \pm 0.3) \times 10^{-1}$ | $(7.1 \pm 0.9) \times 10^{-4}$ | $(1.4 \pm 0.1) \times 10^{-3}$     |
|                                            | NMN <sup>+</sup>  | 4.6±2.7                        | $(2.7 \pm 0.7) \times 10^{-1}$ | 4.9±4.1                        | $(3.9 \pm 1.2) \times 10^1$ | $(8.9 \pm 6.4) \times 10^{-2}$ | $(3.1 \pm 2.2) \times 10^{-1}$ | $(6.8 \pm 0.3) \times 10^{-3}$ | $(2.4 \pm 2.1) \times 10^{-3}$     |

Reactions were performed in 35 mM Tris-HCl buffer (pH 8.0) at 25 °C.  $k_{cat}$  is turnover number,  $K_A$  and  $K_B$  are full steady-state Michaelis constants for cofactor and substrate, respectively.  $k_{ia}$  is the dissociation constant for cofactor binding.  $k_1$  is the on-rate of cofactor,  $k_2$  is the off-rate of cofactor,  $k_3$  is the on-rate of glucose. The microscopic reaction rates were calculated from the relationships  $k_1 = k_{cat}/K_A$ ,  $k_2 = k_{cat} k_{ia} / K_A$ ,  $k_3 = k_{cat}/K_B$ . Detailed rate equations can be found in Methods. Errors shown are the standard deviation of three independent measurements.

<sup>a</sup>Not determined. Enzyme could not be saturated with cofactor concentrations tested.

<sup>b</sup>Not determined. Enzyme could not be saturated with glucose concentrations tested.

**Supplementary Table 3: Plasmids and strains used in this study**

| <b>Strains</b>  | <b>Description</b>                                                                                                                        | <b>Reference</b> |
|-----------------|-------------------------------------------------------------------------------------------------------------------------------------------|------------------|
| XL-1 Blue       | Cloning strain                                                                                                                            | Stratagene       |
| BL21 (DE3)      | Protein expression strain                                                                                                                 | Invitrogen       |
| BW25113         | <i>E. coli</i> $\Delta(araD-araB)567$ , $\Delta lacZ4787(::rrnB-3)$ , $\lambda$ -, <i>rph-1</i> , $\Delta(rhaD-rhaB)568$ , <i>hsdR514</i> | Keio Collection  |
| JW2670-1        | BW25113 $\Delta pncC::kan$                                                                                                                | Keio Collection  |
| MX101           | BW25113 $\Delta pncC \Delta nadR::kan$                                                                                                    | This study       |
| MX102           | BW25113 $\Delta pncC \Delta pgi \Delta zwf \Delta gntK::kan$                                                                              | This study       |
| MX103           | BW25113 $\Delta pncC \Delta pgi \Delta zwf \Delta nadR \Delta gnd::kan$                                                                   | This study       |
| <b>Plasmids</b> | <b>Description</b>                                                                                                                        | <b>Reference</b> |
| pEK101          | <i>P<sub>LlacO1</sub>::Bs gdh</i> , ColE1 <i>ori</i> , Amp <sup>R</sup>                                                                   | This study       |
| pEK102          | <i>P<sub>LlacO1</sub>::Pp xenA</i> , ColE1 <i>ori</i> , Amp <sup>R</sup>                                                                  | This study       |
| pLZ201          | <i>P<sub>LlacO1</sub>::Bs gdh</i> N92A, ColE1 <i>ori</i> , Amp <sup>R</sup>                                                               | This study       |
| pLZ202          | <i>P<sub>LlacO1</sub>::Bs gdh</i> N92V, ColE1 <i>ori</i> , Amp <sup>R</sup>                                                               | This study       |
| pLZ203          | <i>P<sub>LlacO1</sub>::Bs gdh</i> G94S, ColE1 <i>ori</i> , Amp <sup>R</sup>                                                               | This study       |
| pLZ204          | <i>P<sub>LlacO1</sub>::Bs gdh</i> I195R, ColE1 <i>ori</i> , Amp <sup>R</sup>                                                              | This study       |
| pLZ205          | <i>P<sub>LlacO1</sub>::Bs gdh</i> I195S, ColE1 <i>ori</i> , Amp <sup>R</sup>                                                              | This study       |
| pLZ206          | <i>P<sub>LlacO1</sub>::Bs gdh</i> I195T, ColE1 <i>ori</i> , Amp <sup>R</sup>                                                              | This study       |
| pLZ207          | <i>P<sub>LlacO1</sub>::Bs gdh</i> S17Q-P194N, ColE1 <i>ori</i> , Amp <sup>R</sup>                                                         | This study       |
| pLZ208          | <i>P<sub>LlacO1</sub>::Bs gdh</i> M143S, ColE1 <i>ori</i> , Amp <sup>R</sup>                                                              | This study       |
| pLZ209          | <i>P<sub>LlacO1</sub>::Bs gdh</i> M143T, ColE1 <i>ori</i> , Amp <sup>R</sup>                                                              | This study       |
| pLZ210          | <i>P<sub>LlacO1</sub>::Bs gdh</i> I195R-A93K-Y39Q, ColE1 <i>ori</i> , Amp <sup>R</sup>                                                    | This study       |
| pLZ211          | <i>P<sub>LlacO1</sub>::Bs gdh</i> I195R-Y39Q, ColE1 <i>ori</i> , Amp <sup>R</sup>                                                         | This study       |
| pLZ212          | <i>P<sub>LlacO1</sub>::Bs gdh</i> I195R-A93K, ColE1 <i>ori</i> , Amp <sup>R</sup>                                                         | This study       |
| pLZ213          | <i>P<sub>LlacO1</sub>::Bs gdh</i> A93K, ColE1 <i>ori</i> , Amp <sup>R</sup>                                                               | This study       |
| pLZ214          | <i>P<sub>LlacO1</sub>::Bs gdh</i> Y39Q, ColE1 <i>ori</i> , Amp <sup>R</sup>                                                               | This study       |
| pLZ215          | <i>P<sub>LlacO1</sub>::Bs gdh</i> A93K-Y39Q, ColE1 <i>ori</i> , Amp <sup>R</sup>                                                          | This study       |
| pLZ216          | <i>P<sub>LlacO1</sub>::Bs gdh</i> I195R-A93K-Y39Q-S17E, ColE1 <i>ori</i> , Amp <sup>R</sup>                                               | This study       |
| pLZ217          | <i>P<sub>BAD</sub>::Pp xenA</i> , RSF <i>ori</i> , Spec <sup>R</sup>                                                                      | This study       |
| pLZ218          | <i>P<sub>BAD</sub>::Bs gdh</i> I195R-A93K-Y39Q-S17E - <i>Pp xenA</i> , RSF <i>ori</i> , Spec <sup>R</sup>                                 | This study       |

|        |                                                                                         |            |
|--------|-----------------------------------------------------------------------------------------|------------|
| pLZ219 | <i>P<sub>BAD</sub>::Bs gdh - Pp xenA, RSF ori, Spec<sup>R</sup></i>                     | This study |
| pLZ220 | <i>P<sub>BAD</sub>::Bs gdh - Ca lvr, RSF ori, Spec<sup>R</sup></i>                      | This study |
| pLZ221 | <i>P<sub>BAD</sub>::Bs gdh I195R-A93K-Y39Q-S17E - Ca lvr, RSF ori, Spec<sup>R</sup></i> | This study |
| pLZ222 | <i>P<sub>BAD</sub>::Ca lvr, RSF ori, Spec<sup>R</sup></i>                               | This study |
| pLZ223 | <i>P<sub>BAD</sub>::Bs gdh - Rs adh, RSF ori, Spec<sup>R</sup></i>                      | This study |
| pLZ224 | <i>P<sub>BAD</sub>::Bs gdh I195R-A93K-Y39Q-S17E - Rs adh, RSF ori, Spec<sup>R</sup></i> | This study |
| pLZ225 | <i>P<sub>BAD</sub>::Rs adh, RSF ori, Spec<sup>R</sup></i>                               | This study |
| pLZ226 | <i>P<sub>LlacO1</sub>::Pp xenA - Ca lvr - Rs adh, ColE1 ori, Amp<sup>R</sup></i>        | This study |
| pSM101 | <i>P<sub>LlacO1</sub>::Bm BM3, ColE1 ori, Amp<sup>R</sup></i>                           | This study |
| pSM102 | <i>P<sub>LlacO1</sub>::Bm BM3 W1046S, ColE1 ori, Amp<sup>R</sup></i>                    | This study |
| pSM103 | <i>P<sub>LlacO1</sub>::Ft nadEV - Zm glf - Re gntK, ColE1 ori, Amp<sup>R</sup></i>      | This study |
| pSM104 | <i>P<sub>LlacO1</sub>::Zm glf, ColE1 ori, Amp<sup>R</sup></i>                           | This study |
| pSM105 | <i>P<sub>LlacO1</sub>::Empty, ColE1 ori, Amp<sup>R</sup></i>                            | This study |
| pSM106 | <i>P<sub>BAD</sub>::Bs gdh I195R-A93K-Y39Q-S17E, RSF ori, Spec<sup>R</sup></i>          | This study |
| pSM107 | <i>P<sub>BAD</sub>::Bs gdh, RSF ori, Spec<sup>R</sup></i>                               | This study |
| pSM108 | <i>P<sub>BAD</sub>::Empty, RSF ori, Spec<sup>R</sup></i>                                | This study |
| pSM109 | <i>P<sub>LlacO1</sub>::Zm glf, p15A ori, Cm<sup>R</sup></i>                             | This study |
| pSM110 | <i>P<sub>LlacO1</sub>::Zm glf, ColE1 ori, Cm<sup>R</sup></i>                            | This study |
| pWB201 | <i>P<sub>LlacO1</sub>::Sc OYE3, ColE1 ori, Amp<sup>R</sup></i>                          | This study |
| pWB202 | <i>P<sub>LlacO1</sub>::Ec nfsB, ColE1 ori, Amp<sup>R</sup></i>                          | This study |
| pWB203 | <i>P<sub>LlacO1</sub>::Ft nadEV, ColE1 ori, Amp<sup>R</sup></i>                         | This study |

---

Abbreviations indicate source of genes: *Ca*, *Corynebacterium aquaticum*; *Bm*, *Bacillus megaterium*; *Bs*, *Bacillus subtilis*; *Ft*, *Francisella tularensis*; *Pp*, *Pseudomonas putida*; *Re*, *Ralstonia eutropha H16*; *Rs*, *Ralstonia sp.*; *Sc*, *Saccharomyces cerevisiae*; *Zm*, *Zymomonas mobilis*

**Supplementary Table 4: Accession numbers for proteins used in this study**

| Protein Name   | Full Name                                           | Protein ID             |
|----------------|-----------------------------------------------------|------------------------|
| <i>Ec</i> PncC | NMN aminohydrolase                                  | P0A6G3.1               |
| <i>Ec</i> NadR | NMN adenylyltransferase                             | P27278.2               |
| <i>Ec</i> Pgi  | Glucose-6-phosphate isomerase                       | P0A6T1                 |
| <i>Ec</i> Zwf  | NADP(+)-dependent glucose-6-phosphate dehydrogenase | P0AC53                 |
| <i>Ec</i> Gnd  | 6-phosphogluconate dehydrogenase                    | P00350                 |
| <i>Ec</i> GntK | D-gluconate kinase                                  | P46859                 |
| <i>Ec</i> NfsB | Oxygen-insensitive NAD(P)H nitroreductase           | P38489                 |
| <i>Ft</i> NadE | NAD(+) synthase                                     | Q5NFH5                 |
| <i>Ft</i> NadV | Nicotinate phosphoribosyltransferase                | A0A4Q7HER8             |
| <i>Zm</i> Glf  | Glucose facilitated diffusion porin                 | A0A2R4S350             |
| <i>Sc</i> OYE3 | Old Yellow Enzyme 3                                 | P41816                 |
| <i>Re</i> GntK | D-Gluconate kinase                                  | Q0KCF1                 |
| <i>Bm</i> BM3  | Bifunctional fatty acid monooxygenase               | Addgene plasmid #85102 |
| <i>Bs</i> Gdh  | Glucose 1-dehydrogenase                             | P12310                 |
| <i>Pp</i> XenA | NADH: flavin oxidoreductase/NADH oxidase            | Q9R9V9                 |
| <i>Ca</i> LVR  | Levodione reductase                                 | Q9LBG2.1               |
| <i>Rs</i> ADH  | Alcohol dehydrogenase                               | ACB78191.1             |

**Supplementary Table 5 Mass spectrometry parameters for Intracellular cofactor concentration analysis**

| Compound              | Primary Mass | Secondary Mass | Cone Voltage | Collison Energy |
|-----------------------|--------------|----------------|--------------|-----------------|
| MNA <sup>+</sup> (IS) | 137          | 94             | 20           | 20              |
| NMN <sup>+</sup>      | 335          | 123            | 10           | 10              |
| NAD <sup>+</sup>      | 664          | 135.9          | 20           | 40              |

IS: internal standard

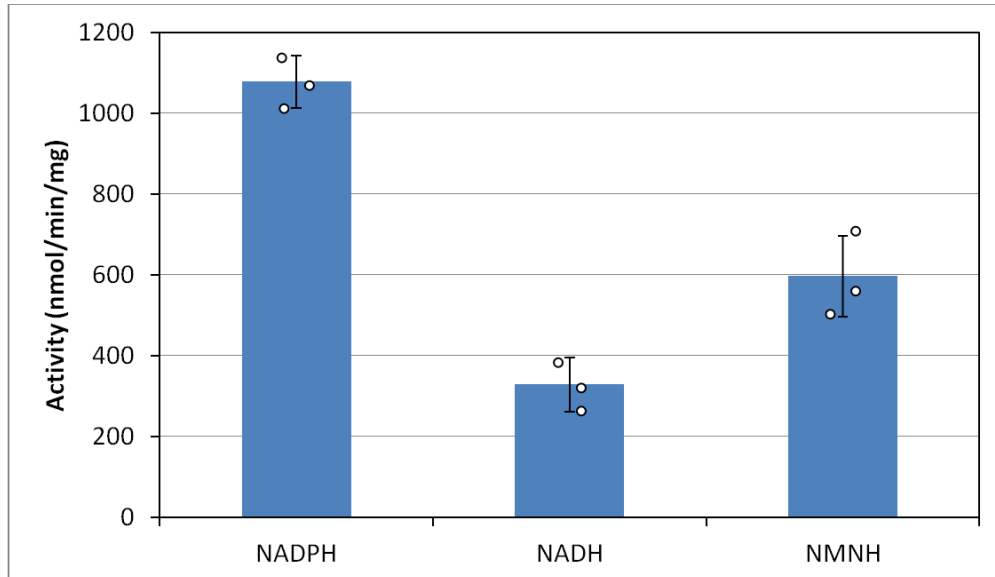

**Supplementary Figure 1:** XenA activity with different cofactors. Using ketoisophorone as the substrate, the activity of purified *Pseudomonas putida* XenA wild type was tested, using NADPH, NADH, or NMNH as the reducing cofactor. The error bars represent the standard deviations of three replicates. These results showed that XenA accepts NMNH as the redox cofactor with comparable activity to the natural cofactors NADPH and NADH. Detailed enzyme assay condition is described in the Methods section.



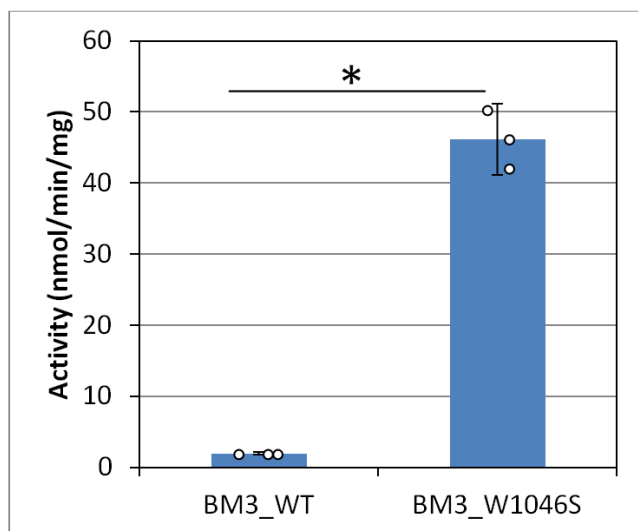

**Supplementary Figure 2:** Engineering P450 BM3 to improve the NMNH-dependent activity. Using cytochrome *c* as the substrate, the NMNH-dependent activity of P450 BM3 wild type and W1046S was measured using purified proteins. The error bars represent the standard deviations of three replicates. The results showed that the W1046S mutation enhanced the NMNH-dependent activity by around 46-fold compared to the wild type. Values are an average of at least three replicates with error bars representing one standard deviation. Two-tailed t-tests were used to determine statistical significance ( $P < 0.05$ ), indicated by an asterisk. Detailed enzyme assay condition is described in the Methods section.

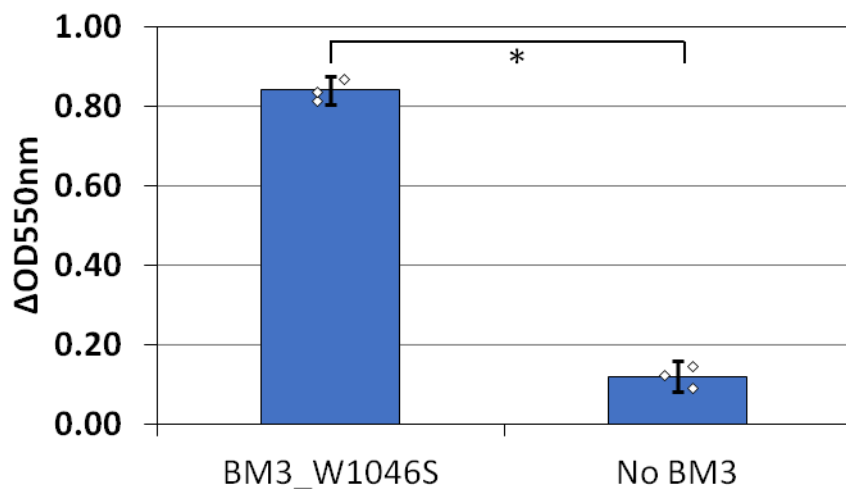

**Supplementary Figure 3:** Cytochrome *c* reduction in the presence and absence of P450 enzyme

Engineering P450 BM3-W1046S facilitated cytochrome *c* reduction via NMN<sup>+</sup> cycling by Bs GDH Triple. The results showed that without BM3 W1046S, the reduction of cytochrome *c*, as indicated by the change of absorbance at 550nm ( $\Delta\text{OD}_{550\text{nm}}$ ), was minimal compared to in the presence of the enzyme. Values are an average of at least three replicates with error bars represent one standard deviation. Two-tailed t-tests were used to determine statistical significance ( $P < 0.05$ ), indicated by an asterisk.

Coupled enzymatic biotransformation condition was used as described in the Methods section. BM3 was added at a concentration of  $0.34 \text{ mg mL}^{-1}$  and  $50 \text{ }\mu\text{M}$  cytochrome *c* (C2506, Sigma) was used as the substrate.

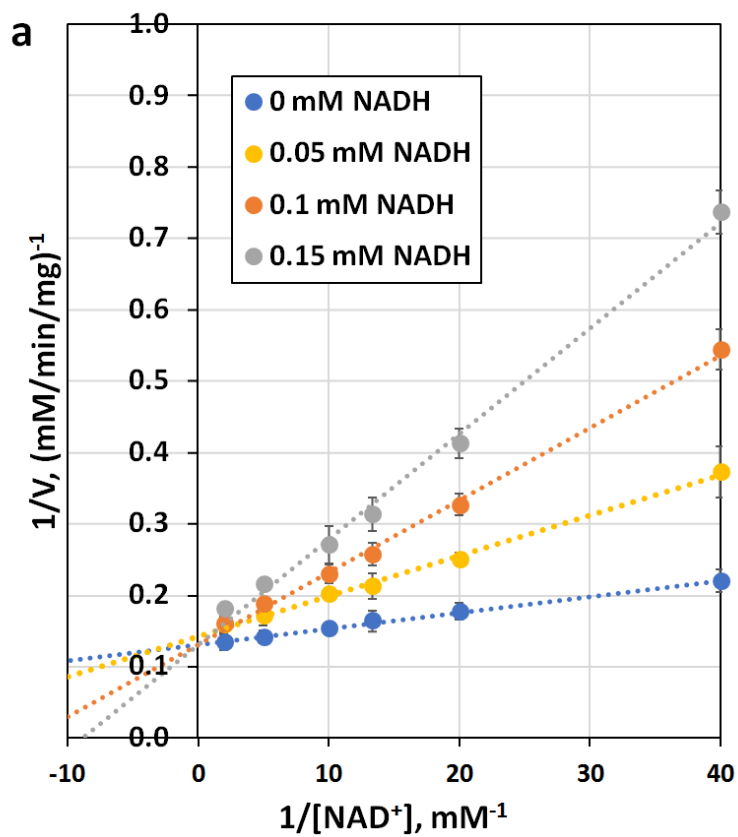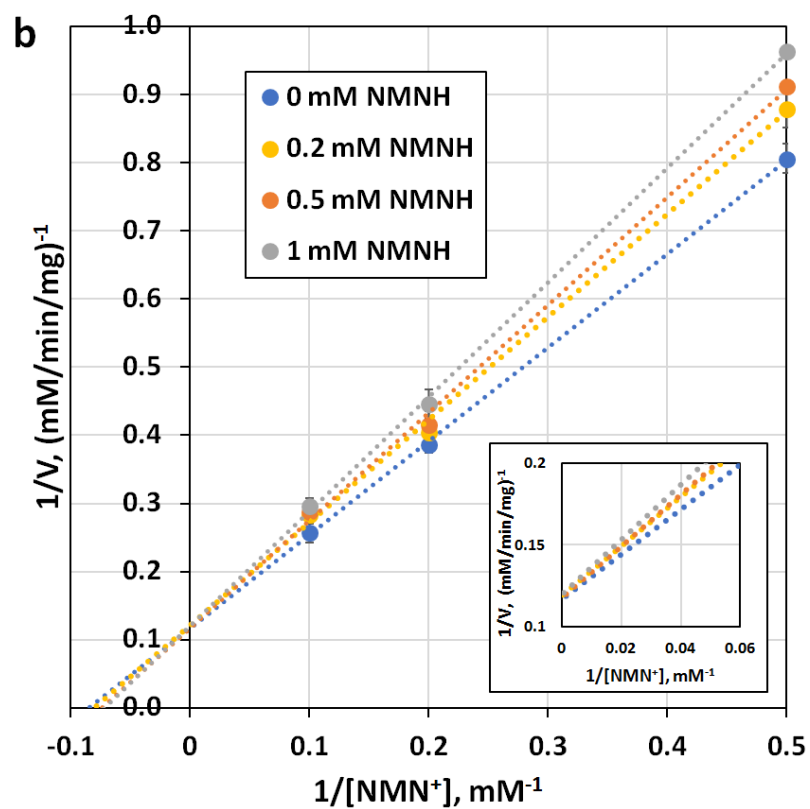

**Supplementary Figure 4:** Production inhibition study of wild type and engineered Bs GDH

(a) Product inhibition of wild type GDH by NADH.  $\text{NAD}^+$  was varied from 0.5 to 0.025 mM. NADH was supplied at 0, 0.05, 0.1, or 0.15mM. (b) Product inhibition of Bs GDH Ortho (I195R-A93K-Y39Q-S17E) by NMNH.  $\text{NMN}^+$  was varied from 2 to 10 mM. NMNH was supplied at 0, 0.2, 0.5, or 1 mM. Inset is a scale-in view of conversion at the y-axis. Glucose was held constant at 50mM for both (a) and (b). Error bars represent one standard deviation of the mean of triplicate experiments. See detailed enzyme assay method in the Methods section.

The results showed that NMNH is a competitive inhibitor for  $\text{NMN}^+$  (b), indicating that the engineered Bs GDH Ortho catalyzes the  $\text{NMN}^+$ -dependent reaction with a ordered bi-bi mechanism. The same mechanism is used by wild type Bs GDH (a).

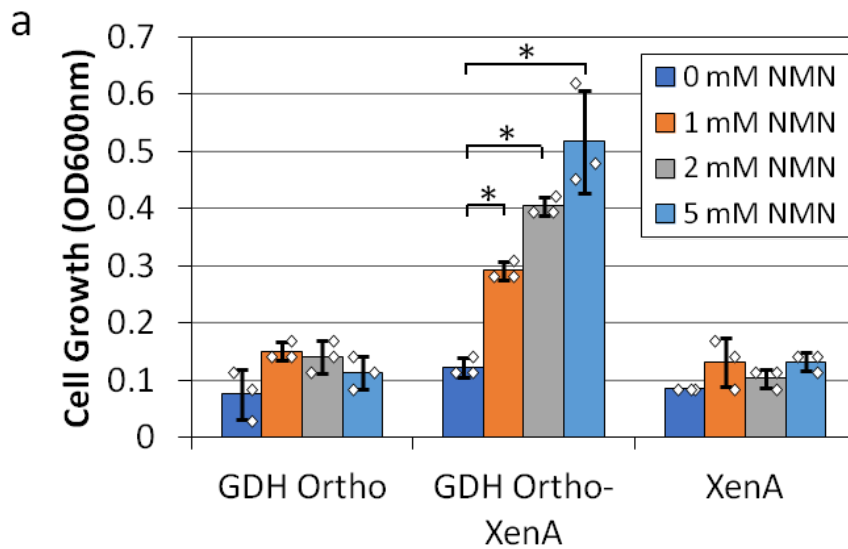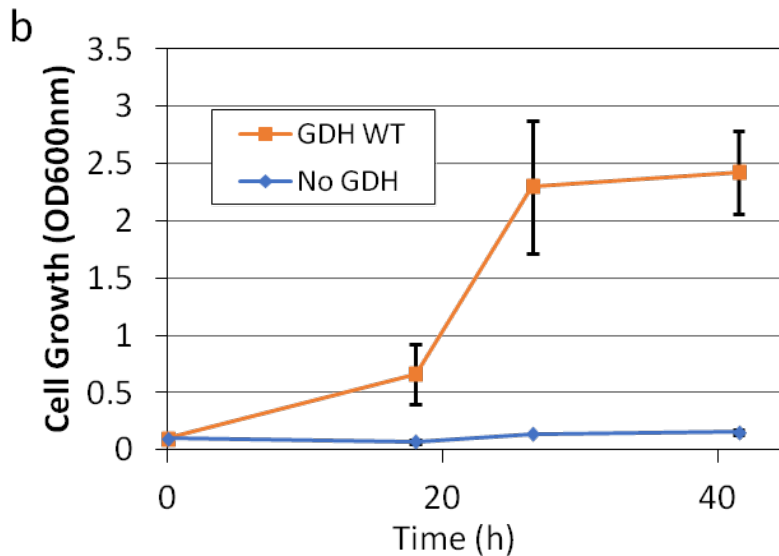

**Supplementary Figure 5: Dependence of growth on NMN<sup>+</sup> concentration**

a. Increased supplementation of NMN<sup>+</sup> supports faster growth via increased Bs GDH Ortho cycling with XenA (NMNH-redox cycling partner). In the strain used (Strain MX103), cell growth was directly tied to Bs GDH activity in minimal glucose media and cofactor regeneration via XenA activity. Metabolism of glucose was limited to the Entner–Doudoroff (ED) pathway in this strain ( $\Delta pgi$ ,  $\Delta zwf$ ,  $\Delta gnd$ ). Therefore, entry to glycolysis for glucose was dependent on Bs GDH Ortho conversion of glucose to gluconate, which was then converted to gluconate-6-phosphate via *gntK*

(*Ralstonia eutropha gntK* was overexpressed to facilitate metabolism). Although native intracellular NMN<sup>+</sup> concentration had been increased in this strain via deletion of NMN<sup>+</sup> degrading pathways ( $\Delta pncC$ ,  $\Delta nadR$ ) and heterologous expression of NMN<sup>+</sup> producing genes (*Francisella tularensis nadEV*), higher cell growth with higher NMN<sup>+</sup> supplement indicated increased metabolism of glucose via Bs GDH activity. The dependence of growth on NMN<sup>+</sup> concentration is only seen in cells that harbor both Bs GDH Ortho and XenA, but not in cells with either of the two redox partners omitted. The error bars represent one standard deviation above the mean of triplicate experiments. Two-tailed t-tests were used to determine statistical significance ( $P < 0.05$ ), indicated by an asterisk.

**b.** Expression of Bs GDH WT enabled robust growth in the single glycolytic pathway (ED pathway) engineered strain MX103 in minimal glucose media. Native cell metabolism was able to supply Bs GDH WT (red) with NAD(P)<sup>+</sup> to support glucose to gluconate cycling without additional cofactor supplementation or a heterologous redox cycling partner. Without expression of Bs GDH (blue), this strain did not demonstrate glucose metabolism. The error bars represent one standard deviation above the mean of triplicate experiments.

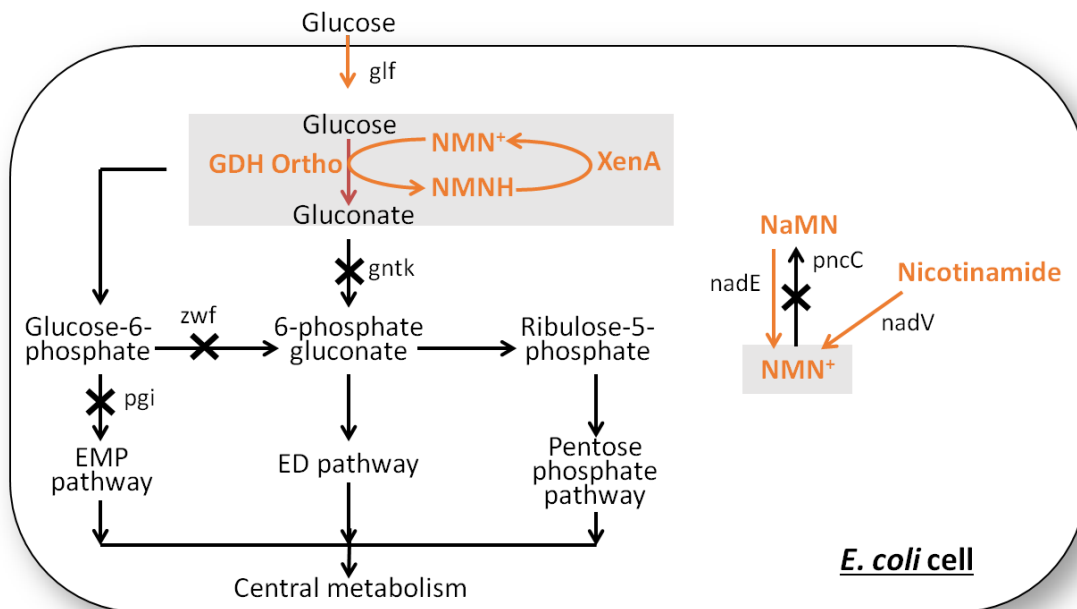

**Supplementary Figure 6: Strain engineered for whole-cell catalyst limits glucose consumption and cofactor regeneration to Bs GDH activity.** Disruption of main glycolytic pathways ( $\Delta pgi$ ,  $\Delta zwf$ ,  $\Delta gntK$ ) eliminated native glucose metabolism. These deletions limited cofactor reduction to only Bs GDH activity in whole cell conversion assays in phosphate buffer. Direct transport of glucose into the cell was enabled by expression of glucose facilitator (Glf). Disruption of  $\text{NMN}^+$  degrading gene ( $\Delta pncC$ ) and overexpression of  $\text{NMN}^+$  producing genes ( $nadE$ ,  $nadV$ ) enabled elevated intracellular levels of  $\text{NMN}^+$  for Bs GDH Ortho cycling.

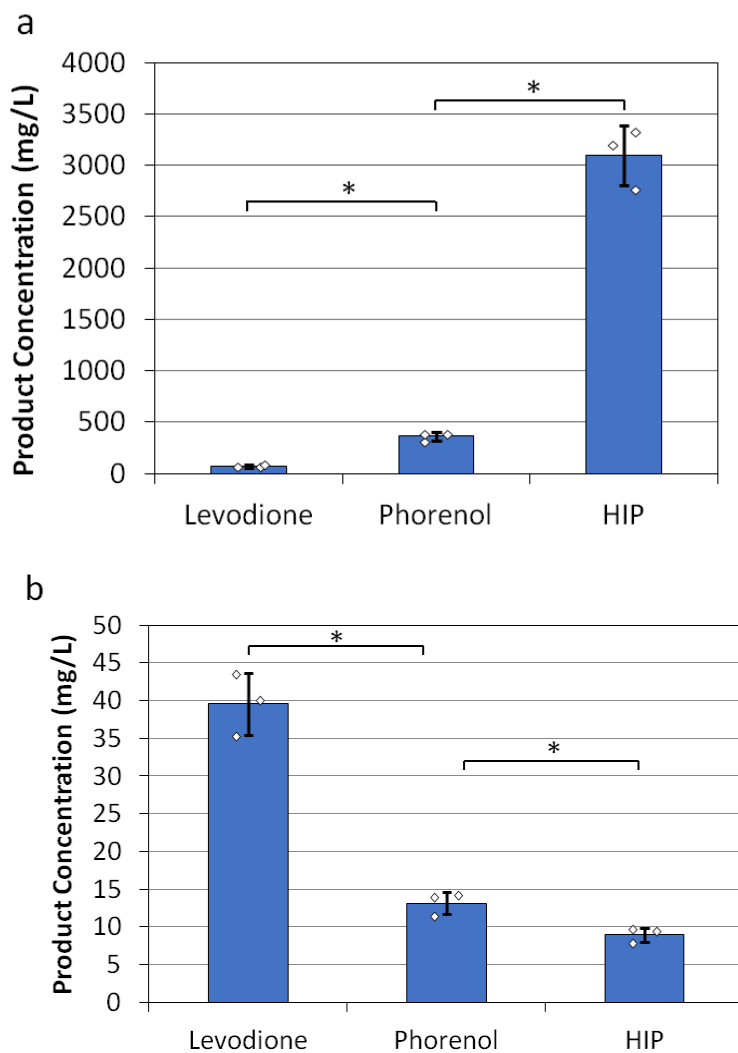

**Supplementary Figure 7: Product levels in whole-cell ketoisophorone (KIP) conversion with co-expression of XenA, LVR, and ADH.** With simultaneous expression of all three KIP converting enzymes, the principal product was determined by the cofactor specificity of GDH. (a) Production of 4-hydroxyisophorone (HIP) was dominant when the redox system was coupled with GDH WT (NAD(P)<sup>+</sup> preference). (b) Production of levodione was dominant when the redox system was coupled with GDH Ortho (NMN<sup>+</sup> preference). XenA, enoate reductase from *Pseudomonas putida*. LVR, levodione reductase from *Corynebacterium aquaticum*. ADH, alcohol dehydrogenase from *Ralstonia sp.* The error bars represent one standard deviation above the mean of triplicate experiments. Two-tailed t-tests were used to determine statistical significance ( $P < 0.05$ ), indicated by an asterisk.



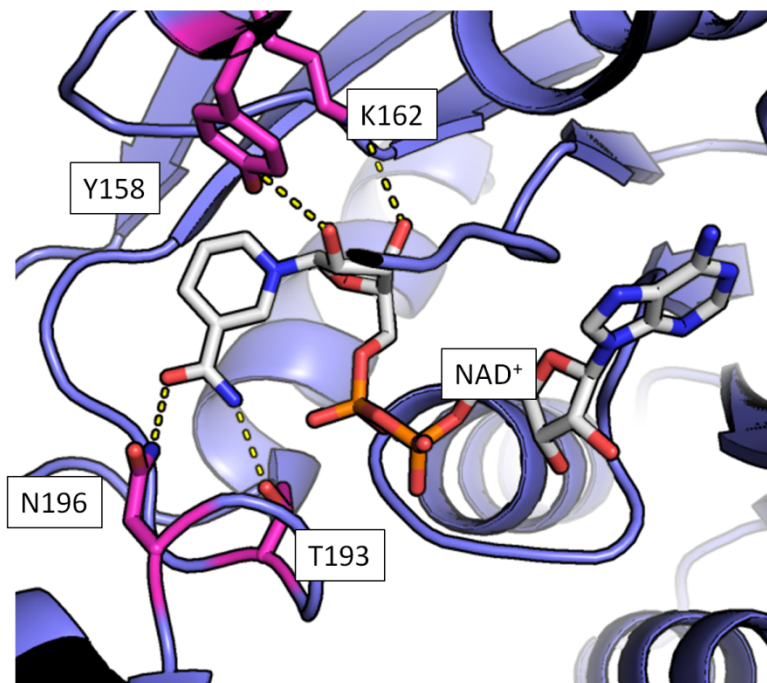

**Supplementary Figure 8** Active site of glucose dehydrogenase with NAD<sup>+</sup> bound (PDB:1GCO). The catalytic residues Y158 and K162 participate in a hydrogen bond network with the hydroxyl groups on the ribose from the nicotinamide half of the NAD<sup>+</sup> molecule. The hydrogen bonds between both N196 and T193 to the amide on NAD<sup>+</sup> suggest that they are potentially critical to the orientation of NAD<sup>+</sup> into a catalytically relevant binding conformation primed for the hydride transfer step.
